# 1 Gene-corrected Parkinson's disease neurons 2 show the A30P alpha-synuclein point 3 mutation leads to reduced neuronal 4 branching and function 5

6 **Peter A. Barbuti** <sup>1,2,3,\*</sup>, **Bruno FR. Santos** <sup>1,2,4</sup>, **Paul M. Antony** <sup>1,4</sup>, **Francois Massart** <sup>1</sup>, **Gérald Cruciani** <sup>1,4</sup>,  
7 **Claire M. Dording** <sup>1,2,4</sup>, **Lukas Pavelka** <sup>1,5</sup>, **Yong-Jun Kwon** <sup>4,6</sup>, **Rejko Krüger** <sup>1,2,4,5,\*</sup>,<sup>S</sup>

8 <sup>1</sup> Translational Neuroscience, Luxembourg Centre for Systems Biomedicine, University of  
9 Luxembourg, L-4362 Luxembourg; peter.barbuti@uni.lu (P.B.); bruno.santos@uni.lu (B.S.);  
10 paul.antony@uni.lu (P.A.); francois.massart@uni.lu (F.M.); gerald.cruciani@uni.lu (G.C.);  
11 claire.dording@uni.lu (C.D.); lukas.pavelka@uni.lu (L.P.); rejko.krueger@uni.lu (R.K.)

12 <sup>2</sup> Transversal Translational Medicine, Luxembourg Institute of Health, L-1445, Luxembourg

13 <sup>3</sup> Department of Neurology, Columbia University Irving Medical Center, 10032, New York, NY, USA

14 <sup>4</sup> Disease Modeling and Screening Platform (DMSP), Luxembourg Institute of Systems Biomedicine,  
15 University of Luxembourg & Luxembourg Institute of Health, 6 avenue du Swing, L-4367, Belvaux,  
16 Luxembourg

17 <sup>5</sup> Parkinson Research Clinic, Centre Hospitalier de Luxembourg (CHL), Luxembourg

18 <sup>6</sup> Department of Oncology, Luxembourg Institute of Health, L-3555, Dudelange, Luxembourg; yong-  
19 jun.kwon@lih.lu (Y-J.K.)

20

21 \* Correspondence: peter.barbuti@uni.lu (P.B.); rejko.krueger@lih.lu (R.K.); Tel. (R.K.): (+352-26970-967)

22

23 **Word count:** 6893

24 **Running title:** Functional impairment in p.A30P SNCA patient-derived isogenic neurons

25 **Keywords:** A30P, alpha-synuclein, dopaminergic neurons, isogenic, neuronal branching,  
26 mitochondria, toxicity

27 **Financial disclosure/conflict of interest:** The authors report no competing interests.

28 **Funding sources:** This research was funded by grants from the Fond National de Recherche  
29 within the PEARL programme (FNR/P13/6682797), the INTER programme  
30 (INTER/LEIR/18/12719318) and the National Centre for Excellence in Research on Parkinson's  
31 disease (NCER-PD) programme and by the European Union's Horizon 2020 research and

32 innovation programme under Grant Agreement No 692320 (WIDESPREAD; CENTRE-PD). The  
33 funders had no role in the design of the study; in the collection, analyses, or interpretation of data;  
34 in the writing of the manuscript, or in the decision to publish the results.

## 35 **Abstract**

36 Parkinson's disease is characterised by the degeneration of A9 dopaminergic neurons and the  
37 pathological accumulation of alpha-synuclein. In a patient-derived stem cell model, we have  
38 generated dopaminergic neurons from an individual harbouring the p.A30P SNCA mutation and  
39 compared those neurons against gene-corrected isogenic control cell lines. We have used confocal  
40 microscopy to assess the neuronal network, specifically segmenting dopaminergic neurons and  
41 have identified image-based phenotypes showing axonal impairment and reduced neurite  
42 branching. We show using multi-electrode array (MEA) technology that the neurons carrying the  
43 endogenous p.A30P alpha-synuclein mutation are functionally impaired and identified  
44 mitochondrial dysfunction as a pathogenic cellular phenotype. We report that against gene-  
45 corrected isogenic control cell lines the neurons carrying the p.A30P SNCA mutation have a  
46 deficit and are susceptible to the mitochondrial toxin and environmental pesticide Rotenone. Our  
47 data supports the use of isogenic cell lines in identifying image-based pathological phenotypes  
48 that can serve as an entry point for future disease modifying compound screenings and drug  
49 discovery strategies.

## 50 **Introduction**

51 Parkinson's disease (PD) is a neurodegenerative disease with no current causative treatment. It  
52 is one of the world's fastest growing neurological disorders <sup>1</sup>, with a global burden expected to  
53 reach 17 million by 2040 <sup>1,2</sup>. PD has two defining neuropathological features; the first is the  
54 degeneration of the A9 dopaminergic neurons of the substantia nigra pars compacta (SNc). It is  
55 still unclear why specifically these neurons degenerate, clinically manifesting as a movement  
56 disorder that was first defined in 1817 as the shaking palsy by James Parkinson <sup>3</sup>. Reviewed  
57 elsewhere, the unique cellular architecture of these dopaminergic nigral neurons including their  
58 large complex arborisation, high bioenergetic demands and resultant oxidative stress, combined  
59 with neuroanatomical telencephalization have been hypothesised among the reasons for this  
60 specific vulnerability <sup>4-6</sup>. Although to provide balance, an alternative and widely-held viewpoint  
61 is that PD is a prion-like disorder <sup>7,8</sup>. Yet, the origin of PD pathogenesis remains unclear. The  
62 formation of intra-cytoplasmic inclusion bodies (Lewy Bodies, LBs) in the dopaminergic neurons  
63 that remain is the second defining neuropathological feature of PD. These LBs contain a high  
64 concentration of lipids, crowded organelles and are immunopositive for alpha-synuclein <sup>9,10</sup>, a  
65 protein found ubiquitously in neurons that is localised to the pre-synaptic terminal <sup>11</sup>.

66 Rare and highly penetrant point mutations in the *SNCA* gene, which encodes the alpha-synuclein  
67 protein leads to the autosomal dominant form of PD at: p.A53T<sup>12</sup>, p.A30P<sup>13</sup>, p.E46K<sup>14</sup>, p.G51D<sup>15</sup>,  
68 and p.A53E<sup>16</sup>. Increased levels of physiological alpha-synuclein caused by multiplications of the  
69 *SNCA* locus by duplication<sup>17,18</sup> or triplication<sup>19</sup> also lead to familial PD in a dose-dependent way,  
70 with the triplication having more severe clinical symptoms and faster disease progression than  
71 the duplication<sup>20</sup>. Moreover, genome wide association studies (GWAS) have identified single  
72 nucleotide polymorphism (SNP) genetic variants in *SNCA* as a risk factor in sporadic PD due to  
73 modulation of alpha-synuclein expression<sup>21-23</sup>.

74 Induced pluripotent stem (iPS) cells, first described by Yamanaka<sup>24</sup> and reviewed elsewhere<sup>25</sup>,  
75 allows differentiated cells such as dermal fibroblasts donated from an individual harbouring a  
76 pathogenic mutation to be reprogrammed to a stem cell state, enabling the generation of patient-  
77 derived iPS cell lines that can be used for disease modelling. The widespread use of targeted  
78 genome editing tools, such as clustered regularly interspaced short palindromic repeats  
79 (CRISPR)-Cas-associated nucleases (CRISPR-Cas9)<sup>26-28</sup>, have enabled these patient-derived iPS  
80 cells, carrying pathogenic point mutations to be corrected, thereby allowing the exact effect of the  
81 pathogenic mutation to be assessed against its isogenic control. Comparison between edited and  
82 founder isogenic cell lines therefore corrects for the effect of inter-individual variation, which, in  
83 addition to the unknown variable of the pathogenic mutation and the limits within each cellular  
84 model<sup>29-31</sup>, can cloud the outcome and interpretation of the observed phenotype when assessing  
85 the mutation-only effect. Consequently, the use of isogenic cell models give much needed clarity  
86 in assessing the molecular mechanisms that underpin disease pathogenicity.

87 Gene editing of an iPS cell line is a technically challenging procedure and refers to editing one or  
88 more cells in a colony composed of multiple cells. Not all cells will be edited and fluorescent  
89 reporters, antibiotic resistance or a combination of both, are used to enrich and/or sort out the  
90 edited cells to generate the isogenic cell line<sup>32-34</sup>. Previously, we showed that with the aid of high-  
91 content screening (HCS) technology we were able to generate multiple single-cell gene-corrected  
92 patient-derived iPS cell clones from a PD patient harbouring the pathogenic p.A30P mutation in  
93 *SNCA*<sup>35</sup>. The advantage of having single-cell clones is that it provides the guarantee that every  
94 cell in that colony and expanded cell line is edited and gene-corrected. Without this approach, it  
95 remains quite possible that the cellular composition of an iPS colony will contain a mixture of  
96 edited and unedited cells. The risk here is that cells within a colony have different proliferation  
97 rates, therefore if the gene-edited modulates cell-cycle, cell-death or developmental mutation, the  
98 cellular composition of the colony can change over the course of the culture and repeated  
99 passaging, leading to unwanted variation in the obtained findings.

100 In our prior study, we generated and characterised multiple gene-corrected single-cell iPSC  
101 clonal lines and found that in comparison to the isogenic founder line, the patient-derived

102 neurons carrying the p.A30P alpha-synuclein mutation had significantly higher *SNCA* expression  
103 than the gene corrected controls<sup>36</sup>. In this follow-up study, we have performed functional  
104 characterisation of two gene-corrected clones and the founder cell line, where only significant  
105 differences of both gene-corrected clones against the patient cell line will be interpreted as the  
106 pathological effect of the p.A30P mutation. In this study, we have assessed complex 3D neuronal  
107 networks, segmenting the TH neurons. We have identified that irrespective of TH number, the  
108 patient-derived neurons carrying the A30P mutation show axonal impairment with reduced  
109 neuronal branching. We assessed the neuronal connectivity using multi-electrode array (MEA)  
110 technology and find reduced neuronal function in the patient neurons carrying the p.A30P  
111 mutation in *SNCA*. Furthermore, we also find mitochondrial dysfunction, with impaired  
112 respiration at basal levels. In addition, we treated these neurons using Rotenone as an  
113 environmental toxin model for PD and found that the neurons carrying the A30P mutation in  
114 alpha-synuclein have a specific reduction in neuronal viability compared to both gene-corrected  
115 iPS-derived neurons. Together, our results support the use of isogenic cell lines to model PD  
116 pathophysiology, identifying an image-based neuronal phenotype and associated functional  
117 phenotypes from the endogenous expression of the pathogenic p.A30P *SNCA* mutation, having  
118 implications for future disease modifying screening strategies.

## 119 **Materials and Methods**

### 120 **Clinical patient information**

121 The pedigree of this family, previously published shows the affected patient (IV, 5 – black arrow)  
122 <sup>13,37</sup>. These affected familial individuals carry an autosomal dominant heterozygous mutation in  
123 c.88G>C *SNCA* that translates the pathogenic A30P form of the alpha-synuclein protein. The  
124 patient concerned in this study is a right-hand dominant individual with an age of disease onset  
125 at 55 years with initial symptoms of extrapyramidal rigidity and bradykinesia dominant on the  
126 right side. The time between first symptoms to diagnosis was 3 months. The patient  
127 showed/presented with a good response to L-Dopa and was treated with Deep Brain Stimulation  
128 (DBS) in 2005 due to emerging motor fluctuations. The disease duration from diagnosis to clinical  
129 examination detailed in Table 1 was 13 years with the age of assessment at 68 years. The patient  
130 had 8 years of formal education up to secondary school. The dopaminergic medication at the time  
131 of the examination in ON state: Madopar p.o. 125mg ½-1/4- ½- ½, Madopar p.o. Depot 125 mg 0-  
132 0-0-1, calculated LEDD (L-DOPA equivalent daily dose) 250mg/day. The medication with central  
133 effect at the time of examination: Venlafaxin p.o. 150mg 0-0-0-1. The patient was examined by a  
134 specialized neurologist using UPDRS score in Table 1 (N.B. This is the older version of the UPDRS  
135 not the MDS-UPDRS). The clinical phenotype of the motor and non-motor symptoms are shown  
136 in Table 2.



## 137 **Cell line**

138 A biopsy of dermal fibroblasts was donated with informed consent at 67 years of age. The  
139 generation and characterisation of induced pluripotent stem cells (iPSCs) from the dermal  
140 fibroblasts has been described <sup>38</sup> and has a unique identifier HIHDNDi001-B  
141 (<https://hpscereg.eu/cell-line/HIHDNDi001-B>). The generation of single-cell gene-corrected  
142 patient-derived iPS clones from the A30P patient has also been described <sup>35</sup>. Ethical approval was  
143 obtained from the National Committee for Ethics in Research, Luxembourg (Comité National  
144 d’Ethique dans la Recherche; CNER #201411/05).

## 145 **Maintenance of iPS, generation of NPCs and differentiation to vmDA neurons.**

146 The maintenance of induced pluripotent stem cells (iPSCs) has been previously described <sup>38</sup>. The  
147 generation of ventral midbrain dopaminergic (vmDA) neurons was performed according to the  
148 protocol elsewhere described <sup>39</sup>. The vmDA neurons were generated via a multipotent neuronal  
149 precursor cell (NPC) stage, the generation and characterisation of the NPCs and vmDA neurons  
150 used this study has been previously described <sup>35</sup>.

## 151 **Assessment of neuronal networks**

152 After 35 days of directed neuronal differentiation, neurons were treated with pre-warmed  
153 Accutase® (Sigma-Aldrich, St. Louis, MO, USA; A6964) for approximately 10 minutes and placed  
154 in an incubator (37 °C, 5% CO<sub>2</sub>). The neurons were dissociated to obtain a single-cell suspension  
155 before DMEM was added and the cells centrifuged (300 g; 5 mins). The neurons were plated at  
156 200,000 cells/cover slip with the addition of 10 µM Rho-Kinase Inhibitor Y-27632 (10 µM; Abcam,  
157 Cambridge, UK; Ab120129). After 48 hours, the neurons were fixed and stained as previously  
158 described <sup>38</sup> using primary antibodies for β-3-Tubulin (TUJ1; 1:200; BioLegend, San Diego, CA,  
159 USA; 801201) and TH (1:300; Millipore, Burlington, MA, USA; AB152) <sup>35</sup>. For the image  
160 acquisition, 10 to 12 Z-stack images per coverslip were acquired using Zeiss spinning disk  
161 confocal microscope from four independent directed neuronal differentiations. The custom image  
162 analysis algorithms for the morphological analysis of neurology morphology, neurite  
163 morphology and skeletonisation, nuclei segmentation and TH neuron segmentation have been  
164 previously described <sup>40,41</sup>.

## 165 **Assessment of cellular function**

### 166 **Electrical recording using multi-electrode arrays (MEAs)**

167 Neurons were dissociated after 45 days of directed differentiation and plated at 200,000 cells/well  
168 into a minimum of 4 wells of a 48-well (16 electrode) CytoView MEA™ (Axion Biosystems,  
169 Atlanta, GA, USA; M768-tMEA-48W). The neurons were cultured on the plate for an additional  
170 10 days and recorded at d55. The recording of the MEA plate has been previously described <sup>41</sup>.

171 Briefly, the MEA plate was recorded using the Axion Integrated Studio (AxIS) software, version  
172 2.1 (Axion Biosystems, Atlanta, GA, USA) on the Axion Maestro (Axion Biosystems, Atlanta, GA,  
173 USA). The plate was recorded for 5 minutes at 37 °C and 5% CO<sub>2</sub>. The 5% CO<sub>2</sub> was obtained from  
174 a compressed gas bottle (Linde, Munich, Germany) and was regulated to the MEA at 0.2 bar. Re-  
175 recording of the MEA was performed using AxIS, software version 2.5, with a Butterworth  
176 (200Hz-3kHz) filter. The Spike Detector program was used to measure activity, the Adaptive  
177 Threshold Crossing method was used to detect crossings at 6x Standard Deviation. The neural  
178 metrics were analysed using the Neural Metric Tool, software version 2.6.1 (Axion Biosystems,  
179 Atlanta, GA, USA). The threshold for an active electrode was set to five spikes per minute.

## 180 **Assessment of mitochondrial function**

### 181 **Mitochondrial bioenergetics using Seahorse**

182 The detection of oxygen consumption rate (OCR) and extracellular acidification rate (ECAR) was  
183 determined using an XFe96 Extracellular flux bioanalyzer (Agilent technologies, Santa Clara, CA,  
184 USA) using a mitochondrial stress test. Briefly, neurons were differentiated for 44 days of directed  
185 differentiation prior to be treated with Accutase® for 5-20 minutes and seeded on the assay plate  
186 precoated 24 hours prior with 200 µg/mL Laminin (Sigma-Aldrich, St. Louis, MO, USA; L2020).  
187 Neurons were seeded (80,000 cells/well) in 80 µL, a minimum of 8 technical replicates were used  
188 with the perimeter wells avoided. Cells were left for an hour at room temperature to avoid edge  
189 effect before being incubated at 37 °C. The day prior to the assay the assay cartridge was hydrated  
190 with XF-calibrant solution and incubated in a non-CO<sub>2</sub> incubator as per manufacturer  
191 instructions. On the day of the experiment homemade buffered assay media was prepared for the  
192 assay containing DMEM (#D5030), supplemented with Glucose (21.25 mM; 47829), Pyruvate (40  
193 mg/L; P2256) and L-Glutamine (2 mM; G7513) (all reagents were acquired from Sigma-Aldrich,  
194 St. Louis, MO, USA), and pH calibrated to 7.4 following 37 °C non-CO<sub>2</sub> incubation. The cells were  
195 washed twice with buffered assay media to give a final volume of 175 µL and incubated for 1  
196 hour at 37 °C in a non-CO<sub>2</sub> incubator. For the mitochondrial stress test assay, Oligomycin (1 µM;  
197 75351), FCCP (250 nM; C2920) and Rotenone and Antimycin A (5 µM; 557368 and A8674) was  
198 used (all chemicals were acquired from Sigma-Aldrich, St. Louis, MO, USA). The experiment was  
199 designed and run using Wave 2.6.0 software (Agilent technologies, Santa Clara, CA, USA). Post-  
200 experiment, the plate was lysed using RIPA buffer and normalised to protein using the BCA assay  
201 with the perimeter wells used to contain the standards in triplicate. Post-normalisation, the  
202 experimental data was exported using the Seahorse XF Cell Mito Stress Test Report Generator.  
203 The Multi-File Seahorse XF Cell Mito Stress Test Report Generator was used to assess three  
204 biological replicates with statistical analysis performed in GraphPad Prism software version 8  
205 (GraphPad Software Inc. La Jolla, CA, USA).

### 206 **Assessment of neuronal viability**

207 The CellTiter-Glo® Luminescent Cell Viability Assay (Promega, Madison, WI, USA; G7570) was  
208 used according to the manufacturer instructions to determine cell viability based on the real-time  
209 quantification of ATP, which is directly proportional to the number of cells in the culture. Briefly,  
210 after 34 days of directed differentiation, the neurons were treated with Accutase® for 10 minutes  
211 and seeded on a 384-well plate pre-coated 24 hours earlier with Geltrex™ LDEV-Free Reduced  
212 Growth Factor Basement Membrane Matrix (Thermo Fisher Scientific, Waltham, MA, USA;  
213 A1413201). Neurons were seeded at 25,000 cells/ well and were maintained in the plate for 5 days  
214 before treatment. Rotenone (Sigma-Aldrich, St. Louis, MO, USA; 557368) or DMSO was added  
215 using the Echo® acoustic liquid handler (Labcyte Inc., San Jose, CA, USA) with a 16 hour  
216 incubation. The total luminescence was normalised to the confluence percentage using the  
217 SpectraMax i3x Multi-Mode Microplate Reader i3 (Molecular Devices®, San Jose, CA, USA) that  
218 was taken on the same day of experiment prior to the addition of Rotenone or DMSO. The  
219 luminescence was measured using the Cytation 5 (Bio-Tek Instruments Inc., Agilent technologies,  
220 Santa Clara, CA, USA) with a minimum of eight technical replicates used per condition. The  
221 experiment was repeated following four independent neuronal differentiations.

## 222 **Results**

### 223 *Morphometric analysis of neuronal network reveals axonal pathology with specific reduction of* 224 *neuronal branchpoints in the A30P patient*

225 Previously, we had used CRISPR-Cas9 technology to gene-correct the c.88G>C, p.A30P SNCA  
226 mutation in the patient iPSCs<sup>35</sup>. Two single-cell patient-derived gene-corrected isogenic iPSC  
227 clones were fully characterised with vmDA neurons were generated, characterised, and  
228 quantified<sup>35</sup>. In order to perform detailed neuronal network analysis, Z-stacks were generated  
229 using fluorescently labelled antibodies specific for the neuronal marker, TUJ1 and the  
230 dopaminergic marker, Tyrosine Hydroxylase (TH). A representative image of a maximum  
231 intensity image of each cell line is shown (Fig. 1A).

232 Previously we found no significant difference in the number of neurons generated between the  
233 cell lines<sup>35</sup>. Yet, when assessing the patient-derived neurons carrying the p.A30P SNCA mutation  
234 against both isogenic controls our image-based analysis shows axonal pathology with neuronal  
235 area (Fig. 1B) and branchpoints (Fig. 1C) reduced. Normalisation of the neuronal branchpoints to  
236 the corresponding neuronal area confirms a reduction of neuronal branching (Fig. 1D), a newly  
237 identified pan-neuronal phenotype associated with the pathogenic p.A30P alpha-synuclein  
238 protein. In order to determine the extent of the pathology in dopaminergic neurons we performed  
239 neuronal segmentation of the TH+ neurons, representative images of neuronal and TH  
240 segmentation is shown in the supplementary material (Supp. Fig. 1.). We found significant inter-  
241 clonal variation between the two gene-corrected clones in terms of TH area (Fig. 1E) and TH

242 neuron branchpoints (Fig. 1F) where gene-corrected clone 33 shows a significantly higher number  
243 than gene-corrected clone 13 and the founder patient line carrying the A30P mutation. However,  
244 this specific increase in TH area correlates with our previous study which found that the gene-  
245 corrected clone 33 generates approximately double the amount of TH neurons than the sister  
246 gene-corrected clone 13, and the founder patient cell line<sup>35</sup>. Normalising of TH branchpoints by  
247 TH area removes the clonal variation between the two gene-corrected clones due to differences  
248 in differentiation propensity (Fig. 1G). Analysis of non-TH neurons (Supp. Fig. 2) also confirms  
249 the image-based axonal phenotype of reduced neuronal branchpoints and connectivity in  
250 neurons carrying physiological levels of the pathogenic p.A30P alpha synuclein protein.

### 251 *Multi-electrode arrays (MEAs) show reduced neuronal function in A30P patient*

252 After we had established that the neurons carrying the p.A30P alpha-synuclein mutation had a  
253 reduction in branchpoints, a measurement of synaptic connections, we hypothesised that this  
254 would influence neuronal function. We used extracellular multi-electrode arrays (MEAs) to  
255 measure neuronal activity *in-vitro*. A representative example of the seeded neurons on the MEA  
256 device is shown (Fig. 2A), where a heat-map detecting mean firing rate is the measurable  
257 parameter. An example of a raw voltage recording of a single electrode capturing a neuronal  
258 spike is shown (Fig. 2B) with a representative image of a digitally generated waveform profile  
259 displaying a neuronal action potential shown (Fig. 2C). A representative raster plot profile from  
260 a neuronal recording is displayed showing that each cell line exhibits functional active neurons  
261 (Fig. 2D). The neurons carrying the A30P mutation have reduced neuronal function compared to  
262 both gene-corrected clones with decreased mean firing rate (Fig. 2E), decreased number of  
263 synchronised spiking neurons “bursts” (Fig. 2F), and a decreased percentage of bursts (Fig. 3G).  
264 Additional parameters of neuronal function generated by the analysed neuronal recording of  
265 burst frequency, average burst duration, average number of spikes/burst, average inter-burst  
266 interval (IBI), and average IBI coefficient of variation (Figs. 2H-2L) show no difference between  
267 the neurons carrying the A30P mutation and the gene-corrected neurons without the A30P  
268 mutation.

### 269 *Neurons carrying the p.A30P SNCA mutation have reduced mitochondrial function*

270 The results obtained from the MEA recording show reduced neuronal function in the A30P  
271 patient neurons. Neurons are an energy intensive cell type requiring vast amounts of ATP for  
272 synaptic function that is primarily met via oxidative phosphorylation by the mitochondria. In  
273 order to determine the effect of the A30P alpha-synuclein mutation on mitochondrial respiration  
274 we used the Seahorse XFe96 extracellular flux assay to assess the cellular bioenergetics of these  
275 mutant neurons compared to the gene-corrected controls. A mitochondrial stress test was  
276 performed with direct measurement of the oxygen consumption rate (OCR). Mitochondrial  
277 stressors: Oligomycin, FCCP, Antimycin A and Rotenone were added to the neurons to assess

278 different respiratory parameters with the merged profile plot of three biological replicates is  
279 shown (Fig.3A). The neurons carrying the p.A30P mutation have significantly reduced  
280 mitochondrial respiration at basal levels (Fig. 3B) and reduced capability to generate ATP (Fig.  
281 3C). There are also significant reductions in non-mitochondrial respiration (Fig. 3D) and coupling  
282 efficiency (Fig. 3E) from the p.A30P *SNCA* neurons compared to both gene-corrected isogenic  
283 control neurons.

#### 284 *Decreased neuronal viability following complex I inhibition*

285 Having identified specific functional and mitochondrial impairments in the neurons expressing  
286 the p.A30P *SNCA* mutation, we hypothesised that these neurons would be specifically vulnerable  
287 to toxic insult. To assess this we used Rotenone, a complex I inhibitor that leads to the selective  
288 degeneration of TH neurons<sup>42,43</sup>. It is noticeable that compared to both gene-corrected clones the  
289 total luminescence, a measurement of cellular ATP in the viable neurons, although variable is  
290 significantly lower in the patient neurons carrying the A30P mutation (Fig. 4A). Treatment with  
291 increasing concentrations of Rotenone lead to a reduction in ATP and thereby a reduction in  
292 cellular viability (Fig. 4B). The neurons expressing the p.A30P *SNCA* mutation show a specific  
293 vulnerability to treatment with 1 nM of Rotenone leading to a significant fold decrease in cellular  
294 viability compared to both gene-corrected controls. There is no fold change in neuronal viability  
295 between patient and gene corrected controls at concentrations between 10 nM and 10  $\mu$ M. At the  
296 concentration of 100  $\mu$ M of Rotenone, there is a significant fold decrease in cellular viability in  
297 the neurons expressing the p.A30P *SNCA* mutation compared to both gene-corrected controls.  
298 Our results indicate that 100  $\mu$ M of Rotenone is the concentration where the majority of neurons  
299 are no longer viable, whereas the concentration of 1 nM of Rotenone is sufficient to identify a  
300 selective fold change in cellular viability in differentially vulnerable neurons carrying a  
301 pathogenic A30P mutation in alpha-synuclein.

## 302 **Discussion**

303 Parkinson's disease is a disease of neurons, with many neurons other than the innervating striatal  
304 A9 dopaminergic neurons affected<sup>44</sup>. However, why this specific subtype of dopaminergic  
305 neurons in the midbrain is more affected than others and why they degenerate first is a question  
306 occupying various hypotheses elsewhere reviewed<sup>4-7,45</sup>. Although, the physiological role(s) of  
307 alpha-synuclein is unclear and is a much debated topic<sup>46</sup>, one of the generally accepted  
308 physiological functions of alpha-synuclein is the regulation of synaptic vesicle endocytosis<sup>47,48</sup>,  
309 with synaptic dysfunction long-being associated with PD<sup>49,50</sup>. What we have identified from our  
310 phenotyping of functional isogenic neurons is that all neurons carrying a pathogenic point  
311 mutation in *SNCA*, expressing mutant A30P alpha-synuclein protein are impaired. Our image-  
312 based analysis have identified that all neurons, both dopaminergic neurons and non-  
313 dopaminergic neurons show axonal impairment with reduced neuronal branching and



314 connectivity. A general assessment of neuronal function using MEAs has also found that these  
315 pathological neurons are functionally impaired in regards to neuronal spike and burst release  
316 kinetics. Our results fit with a recent study of patient-derived isogenic dopaminergic neurons  
317 carrying the p.A53T *SNCA* mutation that found axonal pathology when compared against its  
318 isogenic control<sup>51</sup>. Taken together, we can consider that pathogenic alpha-synuclein facilitates  
319 axonal impairment via synaptic dysfunction. We must also consider that in the PD patient,  
320 physiological levels of pathogenic alpha-synuclein protein become symptomatic with  
321 catastrophic downstream consequences only in the sixth decade of life. Consequently, the  
322 synaptic plasticity that previously compensated for the mutation-effect must decline during the  
323 aging process and contribute to the disease pathogenesis.

324 Dopaminergic neurons exhibit a characteristic autonomous pacemaking activity, continuous  
325 cycles of synaptic vesicle recycling and the packaging of dopamine within those synaptic vesicles.  
326 All of which, require copious amount of energy. Improperly packaged cytosolic dopamine is  
327 subject to oxidation and can lead to increased levels of oxidant stress with pathogenic  
328 downstream affects<sup>52</sup>. We find that compared to both gene-corrected isogenic control cell lines,  
329 the neurons that express p.A30P alpha-synuclein have a severe energy deficit with reduced basal  
330 respiration and lower levels of ATP production per cell. Our findings align with another study  
331 that gene-corrected the patient-derived p.A53T *SNCA* mutation assessing iPS-derived  
332 dopaminergic neurons, in which deficits in mitochondrial respiration were identified as a PD  
333 phenotype<sup>53</sup>. Moreover, we find that the levels of cellular viability are reduced in the neurons  
334 carrying the pathogenic p.A30P alpha-synuclein variant compared to the gene-corrected isogenic  
335 controls. We have furthermore, defined and established that a concentration of 1 nM Rotenone,  
336 an environmental pesticide and well-established mitochondrial toxin specific to dopaminergic  
337 neurons<sup>42,43</sup>, is sufficient to significantly reduce neuronal viability in our cellular model. The  
338 identification of these neurotoxic parameters has potential implications for high-throughput  
339 disease modelling and drug discovery research by identifying screening parameters to identify  
340 vulnerable neurons, before the implementation of subsequent rescue strategies.

341 Our study is the first functional neuronal analysis in gene-corrected isogenic cell lines from a PD  
342 patient harbouring the pathogenic p.A30P mutation in the *SNCA* gene. Only a small number of  
343 studies have generated patient-derived gene corrected isogenic cell lines harbouring pathogenic  
344 mutations in the *SNCA* gene,<sup>35,51,53-55</sup>. Assessment of the endogenous p.A53T *SNCA* expression in  
345 dopaminergic neurons against their isogenic gene corrected control have identified  
346 mitochondrial dysfunction and apoptosis from increased basal levels of oxidative and nitrosative  
347 stress<sup>53</sup>, reductions in neurite length and complexity<sup>51</sup>, and impaired mitochondria dynamics<sup>55</sup>.  
348 Upregulation of ER stress and activation of the unfolded protein response pathway have been  
349 found neurons in a triplication of the *SNCA* gene dosage<sup>54</sup>, and we previously reported that gene-  
350 correction of the A30P mutation impairs the mitochondrial network<sup>56</sup>.



351 The importance of using isogenic patient-derived gene-corrected cell lines to model disease is  
352 that it enables assessment of the mutation-only effect in isolation from the variation within the  
353 genetic background that by itself may contribute to, or alternatively mask the mutation-specific  
354 phenotypes. However, there are still limitations within our cellular model, the typical efficiency  
355 to generate dopaminergic neurons for PD research is 10-40%<sup>39,57,58</sup>, although recent protocols have  
356 become more efficient<sup>59</sup>, these dopaminergic neurons are not “aged” and modelling age-related  
357 neurodegenerative diseases remains challenging<sup>60</sup>. In order to assess the effect that pathogenic  
358 mutations have on dopaminergic neurons it is fundamental to generate a higher yield of  
359 dopaminergic neurons. Successfully sorting dopaminergic neurons from a mixed neuronal  
360 culture or single-cell analysis would provide further information underlying the specific  
361 vulnerability of dopaminergic neurons. In our cellular model, we have identified that axonal  
362 impairment is not limited to TH neurons. Similarly, in a pathoanatomical study of the brain from  
363 an individual carrying the p.A30P SNCA mutation, extensive neuronal loss was not limited to  
364 the SNc, but also the locus coeruleus and the dorsal motor vagal nucleus<sup>61</sup>. It would be interesting  
365 to address this differential vulnerability and evaluate pure population of vulnerable neurons, i.e.  
366 dopaminergic, against a pure population of less vulnerable neurons, such as GABAergic neurons  
367 from the same individual harbouring a PD causing mutation. This would aid in identifying the  
368 specific molecular mechanisms and machinery underlying the vulnerable dopaminergic  
369 neuronal subtype that fails during PD. Furthermore, dopaminergic neurons in the SNc do not  
370 exist in isolation, improvements in cellular differentiations to regionally specific glia and  
371 microglia leading to multi-culture experiments will ultimately move patient-derived modelling  
372 closer to the patient. This point is often overlooked but is pertinent as alpha-synuclein  
373 immunopositive astroglial “coiled bodies” and oligodendroglial are found in the A30P patient  
374 brain<sup>61</sup>. Our findings provide the first evidence of axonal and neuronal dysfunction together with  
375 mitochondrial dysfunction as causative mechanisms that underpin PD pathology in a patient-  
376 derived isogenic neuronal model of PD harbouring the p.A30P SNCA mutation.

## 377 **References**

- 378 1. Dorsey, E. R., Sherer, T., Okun, M. S. & Bloem, B. R. The Emerging Evidence of the  
379 Parkinson Pandemic. *J. Parkinsons. Dis.* **8**, S3–S8 (2018).
- 380 2. Dorsey, E. R. *et al.* Global, regional, and national burden of Parkinson’s disease, 1990–  
381 2016: a systematic analysis for the Global Burden of Disease Study 2016. *Lancet Neurol.* **17**,  
382 939–953 (2018).
- 383 3. Parkinson, J. An essay on the shaking palsy. 1817. *J. Neuropsychiatry Clin. Neurosci.* **14**,  
384 223–36; discussion 222 (2002).
- 385 4. Bolam, J. P. & Pissadaki, E. K. Living on the edge with too many mouths to feed: Why  
386 dopamine neurons die. *Mov. Disord.* **27**, 1478–1483 (2012).

- 387 5. Surmeier, D. J., Obeso, J. A. & Halliday, G. M. Selective neuronal vulnerability in  
388 Parkinson disease. *Nat. Rev. Neurosci.* **18**, 101–113 (2017).
- 389 6. Diederich, N. J., Surmeier, D. J., Uchihara, T., Grillner, S. & Goetz, C. G. Parkinson's  
390 disease: Is it a consequence of human brain evolution? *Mov. Disord.* **34**, 453–459 (2019).
- 391 7. Brundin, P. & Melki, R. Prying into the Prion Hypothesis for Parkinson's Disease. *J.*  
392 *Neurosci.* **37**, 9808 LP – 9818 (2017).
- 393 8. Ma, J., Gao, J., Wang, J. & Xie, A. Prion-Like Mechanisms in Parkinson's Disease .  
394 *Frontiers in Neuroscience* **13**, 552 (2019).
- 395 9. Shahmoradian, S. H. *et al.* Lewy pathology in Parkinson's disease consists of crowded  
396 organelles and lipid membranes. *Nat. Neurosci.* **22**, 1099–1109 (2019).
- 397 10. Spillantini, M. G., Crowther, R. A., Jakes, R., Hasegawa, M. & Goedert, M.  $\alpha$ -Synuclein in  
398 filamentous inclusions of Lewy bodies from Parkinson's disease and dementia with  
399 Lewy bodies. *Proc. Natl. Acad. Sci.* **95**, 6469–6473 (1998).
- 400 11. Burré, J. The Synaptic Function of  $\alpha$ -Synuclein. *J. Parkinsons. Dis.* **5**, 699–713 (2015).
- 401 12. Polymeropoulos, M. H. *et al.* Mutation in the alpha-synuclein gene identified in families  
402 with Parkinson's disease. *Science* **276**, 2045–7 (1997).
- 403 13. Krüger, R. *et al.* Ala30Pro mutation in the gene encoding alpha-synuclein in Parkinson's  
404 disease. *Nat. Genet.* **18**, 106–108 (1998).
- 405 14. Zarranz, J. J. *et al.* The new mutation, E46K, of  $\alpha$ -synuclein causes parkinson and Lewy  
406 body dementia. *Ann. Neurol.* **55**, 164–173 (2004).
- 407 15. Lesage, S. *et al.* G51D  $\alpha$ -synuclein mutation causes a novel Parkinsonian-pyramidal  
408 syndrome. *Ann. Neurol.* **73**, 459–471 (2013).
- 409 16. Pasanen, P. *et al.* Novel  $\alpha$ -synuclein mutation A53E associated with atypical multiple  
410 system atrophy and Parkinson's disease-type pathology. *Neurobiol. Aging* **35**, 2180.e1–5  
411 (2014).
- 412 17. Chartier-Harlin, M.-C. *et al.* Alpha-synuclein locus duplication as a cause of familial  
413 Parkinson's disease. *Lancet (London, England)* **364**, 1167–9 (2004).
- 414 18. Ibáñez, P. *et al.* Causal relation between A-synuclein locus duplication as a cause of  
415 familial Parkinson's disease. *Lancet* **364**, 1169–1171 (2004).
- 416 19. Singleton, A. B. *et al.* alpha-Synuclein locus triplication causes Parkinson's disease. *Science*  
417 **302**, 841 (2003).
- 418 20. Nishioka, K., Ross, O. A. & Hattori, N. SNCA Gene Multiplication: A Model Mechanism  
419 of Parkinson Disease. in (ed. Ross, O. A.) Ch. 20 (IntechOpen, 2011). doi:10.5772/24726
- 420 21. Pihlstrøm, L. *et al.* A comprehensive analysis of SNCA-related genetic risk in sporadic  
421 parkinson disease. *Ann. Neurol.* **84**, 117–129 (2018).

- 422 22. Edwards, T. L. *et al.* Genome-Wide Association Study Confirms SNPs in SNCA and the  
423 MAPT Region as Common Risk Factors for Parkinson Disease. *Ann. Hum. Genet.* **74**, 97–  
424 109 (2010).
- 425 23. Chiba-Falek, O., Lopez, G. J. & Nussbaum, R. L. Levels of alpha-synuclein mRNA in  
426 sporadic Parkinson disease patients. *Mov. Disord.* **21**, 1703–1708 (2006).
- 427 24. Takahashi, K. *et al.* Induction of Pluripotent Stem Cells from Adult Human Fibroblasts by  
428 Defined Factors. *Cell* **131**, 861–872 (2007).
- 429 25. Li, M. & Izpisua Belmonte, J. C. Looking to the future following 10 years of induced  
430 pluripotent stem cell technologies. *Nat. Protoc.* **11**, 1579–1585 (2016).
- 431 26. Jinek, M. *et al.* A Programmable Dual-RNA-Guided DNA Endonuclease in Adaptive  
432 Bacterial Immunity. *Science (80-. )*. **337**, 816–821 (2012).
- 433 27. Mali, P. *et al.* RNA-Guided Human Genome Engineering via Cas9. *Science (80-. )*. **339**, 823  
434 LP – 826 (2013).
- 435 28. Ran, F. A. *et al.* Genome engineering using the CRISPR-Cas9 system. *Nat. Protoc.* **8**, 2281–  
436 2308 (2013).
- 437 29. Ferrari, E., Cardinale, A., Picconi, B. & Gardoni, F. From cell lines to pluripotent stem  
438 cells for modelling Parkinson’s Disease. *J. Neurosci. Methods* **340**, 108741 (2020).
- 439 30. Chia, S. J., Tan, E.-K. & Chao, Y.-X. Historical Perspective: Models of Parkinson’s Disease.  
440 *Int. J. Mol. Sci.* **21**, (2020).
- 441 31. Ke, M., Chong, C.-M. & Su, H. Using induced pluripotent stem cells for modeling  
442 Parkinson’s disease. *World J. Stem Cells* **11**, 634–649 (2019).
- 443 32. Roberts, B. *et al.* Systematic gene tagging using CRISPR/Cas9 in human stem cells to  
444 illuminate cell organization. *Mol. Biol. Cell* **28**, 2854–2874 (2017).
- 445 33. Steyer, B. *et al.* Scarless Genome Editing of Human Pluripotent Stem Cells via Transient  
446 Puromycin Selection. *Stem cell reports* **10**, 642–654 (2018).
- 447 34. Arias-Fuenzalida, J. *et al.* FACS-Assisted CRISPR-Cas9 Genome Editing Facilitates  
448 Parkinson’s Disease Modeling. *Stem Cell Reports* **9**, 1423–1431 (2017).
- 449 35. Barbuti, P. *et al.* Using High-Content Screening to Generate Single-Cell Gene-Corrected  
450 Patient-Derived iPS Clones Reveals Excess Alpha-Synuclein with Familial Parkinson’s  
451 Disease Point Mutation A30P. *Cells* **9**, (2020).
- 452 36. Barbuti, P. *et al.* Using High-Content Screening Technology as a Tool to Generate Single-  
453 Cell Patient-Derived Gene-Corrected Isogenic iPS Clones for Parkinson’s Disease  
454 Research. (2020). doi:10.20944/preprints202005.0001.v1
- 455 37. Krüger, R. *et al.* Familial parkinsonism with synuclein pathology: clinical and PET studies  
456 of A30P mutation carriers. *Neurology* **56**, 1355–62 (2001).

- 457 38. Barbuti, P. A. *et al.* Generation of two iPSC cell lines (HIHDNDi001-A and HIHDNDi001-B)  
458 from a Parkinson's disease patient carrying the heterozygous p.A30P mutation in SNCA.  
459 *Stem Cell Res.* **48C**, 101951 (2020).
- 460 39. Reinhardt, P. *et al.* Derivation and Expansion Using Only Small Molecules of Human  
461 Neural Progenitors for Neurodegenerative Disease Modeling. *PLoS One* **8**, e59252 (2013).
- 462 40. Antony, P. M. A. *et al.* Fibroblast mitochondria in idiopathic Parkinson's disease display  
463 morphological changes and enhanced resistance to depolarization. *Sci. Rep.* **10**, 1569  
464 (2020).
- 465 41. Hanss, Z. *et al.* Mitochondrial and Clearance Impairment in p.D620N VPS35 Patient-  
466 Derived Neurons. *Mov. Disord.* **n/a**, (2020).
- 467 42. Alam, M. & Schmidt, W. J. Rotenone destroys dopaminergic neurons and induces  
468 parkinsonian symptoms in rats. *Behav. Brain Res.* **136**, 317–324 (2002).
- 469 43. Testa, C. M., Sherer, T. B. & Greenamyre, J. T. Rotenone induces oxidative stress and  
470 dopaminergic neuron damage in organotypic substantia nigra cultures. *Brain Res. Mol.*  
471 *Brain Res.* **134**, 109–118 (2005).
- 472 44. Sulzer, D. & Surmeier, D. J. Neuronal vulnerability, pathogenesis, and Parkinson's  
473 disease. *Mov. Disord.* **28**, 41–50 (2013).
- 474 45. Michel, P. P., Hirsch, E. C. & Hunot, S. Understanding Dopaminergic Cell Death  
475 Pathways in Parkinson Disease. *Neuron* **90**, 675–691 (2016).
- 476 46. Villar-Piqué, A., Lopes da Fonseca, T. & Outeiro, T. F. Structure, function and toxicity of  
477 alpha-synuclein: the Bermuda triangle in synucleinopathies. *J. Neurochem.* **139**, 240–255  
478 (2016).
- 479 47. Lautenschläger, J., Kaminski, C. F. & Kaminski Schierle, G. S. A-Synuclein - Regulator of  
480 Exocytosis, Endocytosis, or Both? *Trends Cell Biol.* **27**, 468–479 (2017).
- 481 48. Vargas, K. J. *et al.* Synucleins regulate the kinetics of synaptic vesicle endocytosis. *J.*  
482 *Neurosci.* **34**, 9364–9376 (2014).
- 483 49. Picconi, B., Piccoli, G. & Calabresi, P. Synaptic dysfunction in Parkinson's disease. *Adv.*  
484 *Exp. Med. Biol.* **970**, 553–572 (2012).
- 485 50. Schirinzi, T. *et al.* Early synaptic dysfunction in Parkinson's disease: Insights from animal  
486 models. *Mov. Disord.* **31**, 802–813 (2016).
- 487 51. Czaniecki, C. *et al.* Axonal pathology in hPSC-based models of Parkinson's disease results  
488 from loss of Nrf2 transcriptional activity at the Map1b gene locus. *Proc. Natl. Acad. Sci.*  
489 **116**, 14280 LP – 14289 (2019).
- 490 52. Burbulla, L. F. *et al.* Dopamine oxidation mediates mitochondrial and lysosomal  
491 dysfunction in Parkinson's disease. *Science (80-. ).* **357**, 1255–1261 (2017).

- 492 53. Ryan, S. D. *et al.* Isogenic Human iPSC Parkinson's Model Shows Nitrosative Stress-  
493 Induced Dysfunction in MEF2-PGC1 $\alpha$  Transcription. *Cell* **155**, 1351–1364 (2013).
- 494 54. Heman-Ackah, S. M. *et al.* Alpha-synuclein induces the unfolded protein response in  
495 Parkinson's disease SNCA triplication iPSC-derived neurons. *Hum. Mol. Genet.* **26**, 4441–  
496 4450 (2017).
- 497 55. Ryan, T. *et al.* Cardiolipin exposure on the outer mitochondrial membrane modulates  $\alpha$ -  
498 synuclein. *Nat. Commun.* **9**, 817 (2018).
- 499 56. Zanin, M. *et al.* Mitochondria-mitochondria interaction networks show altered  
500 topological patterns in Parkinson's disease. *bioRxiv* 2020.03.09.984195 (2020).  
501 doi:10.1101/2020.03.09.984195
- 502 57. Kriks, S. *et al.* Dopamine neurons derived from human ES cells efficiently engraft in  
503 animal models of Parkinson's disease. *Nature* **480**, 547–551 (2011).
- 504 58. Kirkeby, A. *et al.* Generation of Regionally Specified Neural Progenitors and Functional  
505 Neurons from Human Embryonic Stem Cells under Defined Conditions. *Cell Rep.* **1**, 703–  
506 714 (2012).
- 507 59. Stathakos, P. *et al.* A monolayer hiPSC culture system for autophagy/mitophagy studies  
508 in human dopaminergic neurons. *Autophagy* (2020). doi:10.1080/15548627.2020.1739441
- 509 60. Mertens, J., Reid, D., Lau, S., Kim, Y. & Gage, F. H. Aging in a Dish: iPSC-Derived and  
510 Directly Induced Neurons for Studying Brain Aging and Age-Related Neurodegenerative  
511 Diseases. *Annu. Rev. Genet.* **52**, 271–293 (2018).
- 512 61. Seidel, K. *et al.* First appraisal of brain pathology owing to A30P mutant alpha-synuclein.  
513 *Ann. Neurol.* **67**, 684–689 (2010).
- 514 62. van Steenoven, I. *et al.* Conversion between mini-mental state examination, montreal  
515 cognitive assessment, and dementia rating scale-2 scores in Parkinson's disease. *Mov.*  
516 *Disord.* **29**, 1809–1815 (2014).

## 517 **Figure Legends**

518 **Figure 1:** Morphometric analysis of TH network in d30 neurons. (A) Representative image of a  
519 maximum intensity projection of a Z-stack fluorescently labelled with Tuj1 and TH antibodies.  
520 Images taken using a 25x objective, scale bar is 50 $\mu$ M. Identification and quantification of  
521 parameters: (B) Neuron Area, (C) TH Area, (D) Neuron Branchpoints and (E) TH Neuron  
522 Branchpoints were determined. Relative normalisation resulted in (F) Neuron Branchpoints by  
523 Neuron Area, and (G) TH Branchpoints by TH Area. Four biological replicates were used for the  
524 analysis with a minimum of ten Z-stacks analysed by replicate. The graphs displayed in columns  
525 show individual values that refer to the average data per Z-stack. For all statistical analyses, an  
526 ordinary one-way ANOVA was performed with Tukey's post-hoc multiple comparison test. All  
527 graphs were plotted as mean  $\pm$  SD. \*\* p < 0.01, \*\*\*\* p < 0.0001.



528 **Figure 2:** Multi-electrode array neuronal recording of d55 neurons. (A) Representative image  
529 showing the plate layout of recorded neurons with a heat map displaying the mean firing rate.  
530 (B) Representative example of a Waveform profile, (C) Representative example of a Spike plot,  
531 (D) Representative image of a raster plot profile, taken from the well highlighted in (A). Spike  
532 and burst metric parameters identified from the MEA recording: (E) Mean Firing Rate, (F)  
533 Number of Bursts, (G) Burst Percentage, (H) Burst Frequency, (I) Average Burst Duration, (J)  
534 Number of Spikes/Burst, (K) Average Inter-Burst Interval, and (L) Average Inter-Burst Interval  
535 (IBI) Co-efficient of Variation. Three biological replicates were used in the analysis with a  
536 minimum of six technical replicates per recording. The graphs displayed in columns show  
537 individual values that refer to the average data of each well, with each well composed of 16  
538 electrodes. For all statistical analyses, a non-parametric Kruskal-Wallis test was performed using  
539 the Dunn's post hoc multiple comparison test. All graphs were plotted as mean  $\pm$  SD. \* $p < 0.05$ , \*\*  
540  $p < 0.01$ , \*\*\*\*  $p < 0.0001$ .

541 **Figure 3:** Mitochondrial dysfunction in neurons carrying a p.A30P SNCA mutation. (A)  
542 Bioenergetic profile showing oxygen consumption rate (OCR) of patient-derived neurons  
543 following a mitochondrial stress test under basal conditions and following the treatments of the  
544 ATP synthase inhibitor Oligomycin (O, 1 $\mu$ M), the oxidative phosphorylation uncoupler FCCP (F,  
545 500nM), and the electron transport chain inhibitors Rotenone (Complex I) and Antimycin A  
546 (Complex III) (R&A, 10 $\mu$ M). The cumulative OCR profile is shown in ventral midbrain neurons  
547 differentiated for 30 days (n=3). The rates of (B) Basal Respiration, (C) ATP production, (D) Non-  
548 mitochondrial respiration and (E) Coupling efficiency are shown. For all statistical analyses, an  
549 ordinary one-way ANOVA was performed using the Tukey post-hoc multiple comparison test.  
550 All graphs were plotted as mean  $\pm$  SD. \* $p < 0.05$ , \*\*  $p < 0.01$ , \*\*\* $p < 0.001$  \*\*\*\*  $p < 0.0001$ .

551 **Figure 4:** Neuronal viability after Rotenone treatment. (A) Total luminescence profile of the  
552 patient-derived neurons using the CellTiter-Glo® Luminescent Cell Viability Assay with  
553 increasing concentrations of Rotenone treatment performed over 16 hours. The neurons were  
554 differentiated for 40 days, a minimum of eight technical replicates were used per analysis with  
555 four biological replicates performed. For statistical analysis, an ordinary one-way ANOVA was  
556 performed using the Tukey post-hoc multiple comparison test. (B) Fold change in cell viability of  
557 patient-derived neurons normalised to DMSO control. A two-way ANOVA was used with a  
558 Turkey's post-hoc multiple-comparison test. All graphs were plotted as mean  $\pm$  SEM. \* $p < 0.05$ , \*\*  
559  $p < 0.01$ , \*\*\* $p < 0.001$  \*\*\*\*  $p < 0.0001$ .

## 560 Table Legends

561 **Table 1: Clinical Assessment of the A30P patient in September 2010, 13 years of disease duration since diagnosis**

| Clinical assessment            | Score                                    |
|--------------------------------|------------------------------------------|
| Age at the clinical assessment | 68 years                                 |
| Hoehn and Yahr scale           | Stage 3                                  |
| Mini-Mental State Exam (MMSE)  | 26 (equivalent to MoCA 22) <sup>62</sup> |



|                                                        |                     |
|--------------------------------------------------------|---------------------|
| Swab and England Activities of Daily Living Score      | 60%                 |
| Beck Depression Inventory (BDI) Version I total score  | 6                   |
| UPDRS I total score                                    | 1                   |
| UPDRS II total score                                   | 15                  |
| UPDRS IV total score                                   | 3                   |
| UPDRS III total score (ON medication, ON Stimulator)   | 28                  |
| UPDRS III total score (ON medication, OFF Stimulator)  | 57                  |
| UPDRS III total score (OFF medication, ON Stimulator)  | 35                  |
| UPDRS III total score (OFF medication, OFF Stimulator) | 59                  |
| UPDRS III Medication ON/OFF (Stimulation ON) 28/35     | amelioration of 20% |
| UPDRS III Stimulation ON/OFF (Medication ON) 28/57     | amelioration 51%    |

562

563 *Table 2: Clinical diagnosis of the A30P patient motor and non-motor symptoms. Severity indicators: - absent; (+)*  
 564 *discrete/variable; + mild; ++ moderate; +++ marked.*

| Motor Symptoms              | Severity | Non-motor symptoms                     | Severity |
|-----------------------------|----------|----------------------------------------|----------|
| <b>Bradykinesia</b>         | ++       | <b>Subjective cognitive impairment</b> | -        |
| <b>Rigidity</b>             | ++       | <b>Anxiety</b>                         | -        |
| <b>Resting tremor</b>       | -        | <b>Depression</b>                      | +        |
| <b>Postural Instability</b> | ++       | <b>Hallucinations</b>                  | -        |
| <b>L-DOPA response</b>      | ++       | <b>Dysphagia</b>                       | ++       |
| <b>Motor fluctuations</b>   | ++       |                                        |          |
| <b>Dyskinesia</b>           | -        |                                        |          |
| <b>Freezing of Gait</b>     | +        |                                        |          |

565

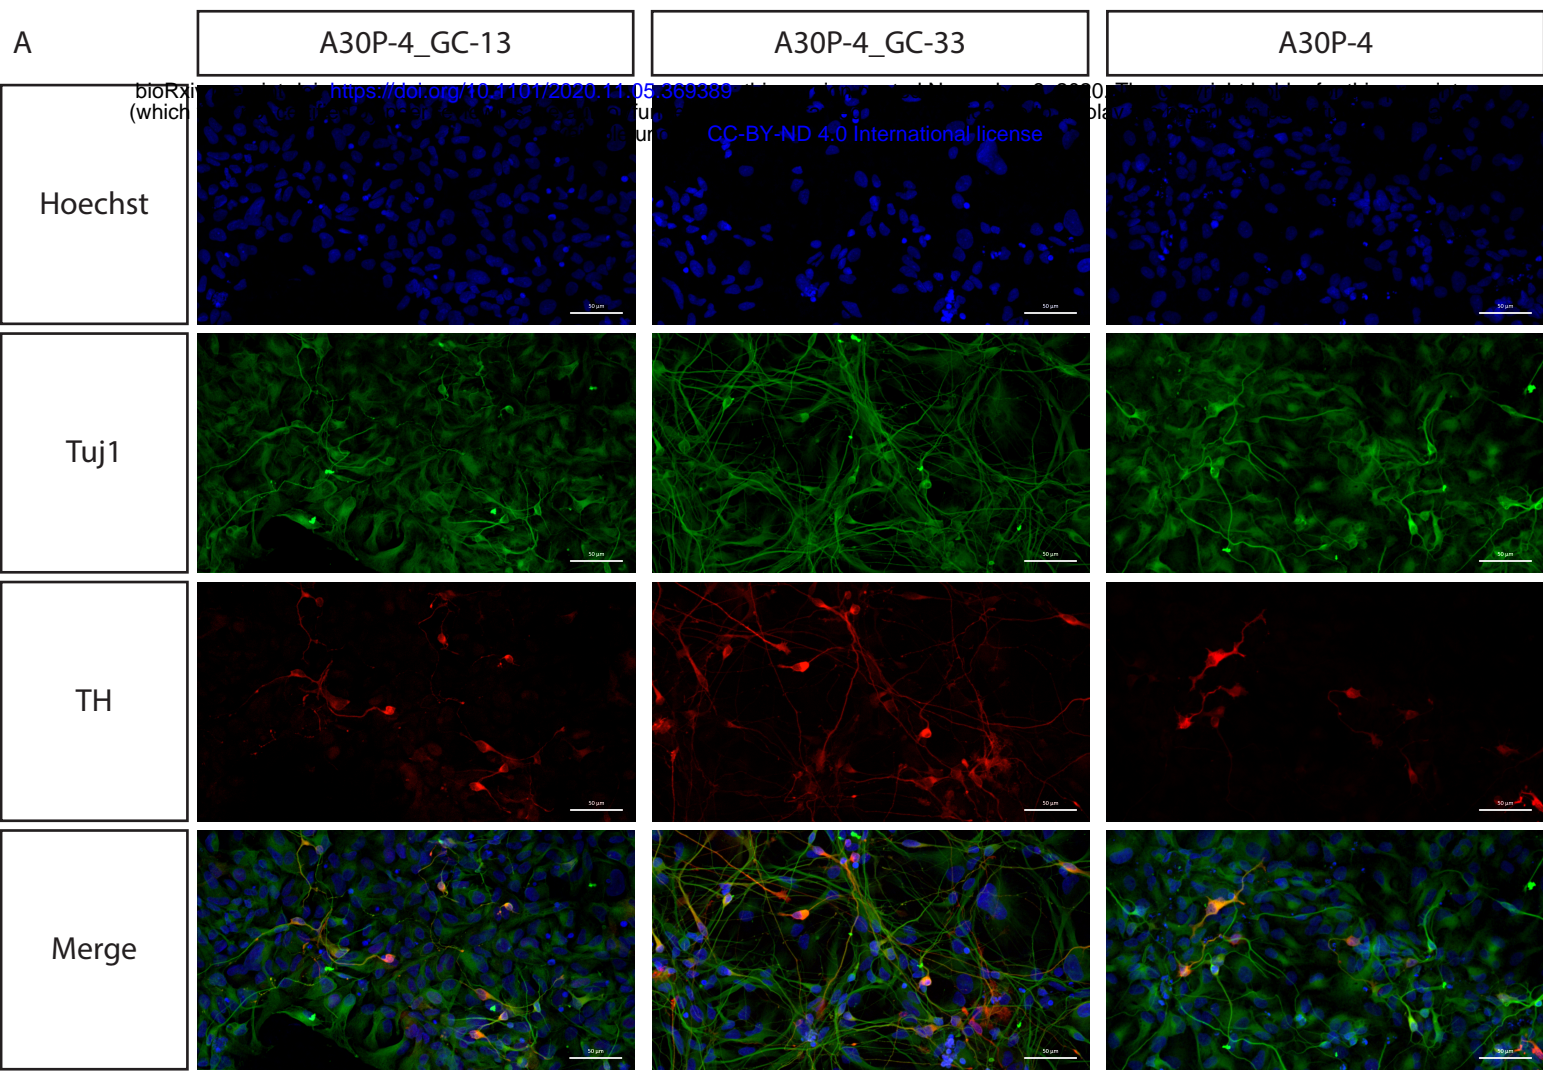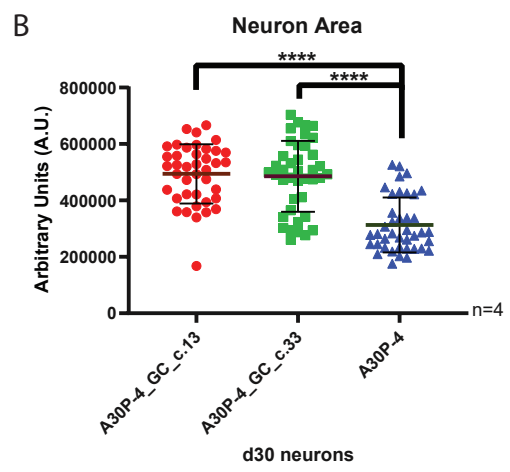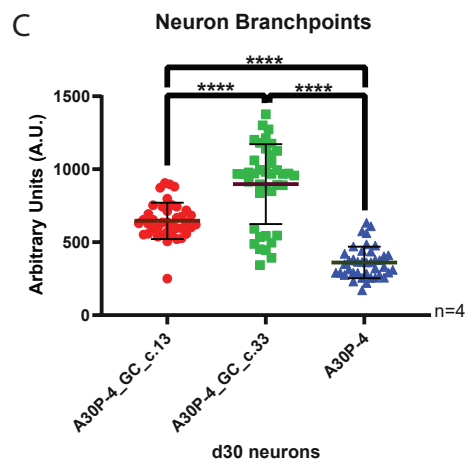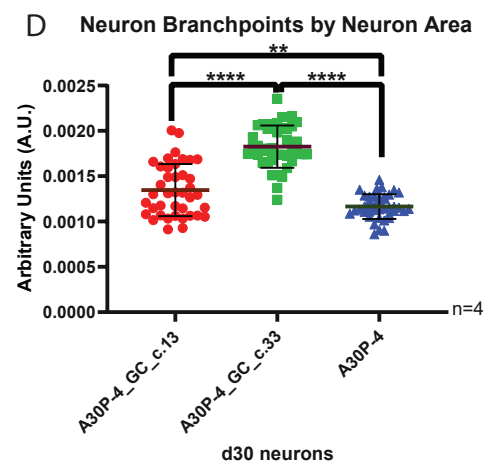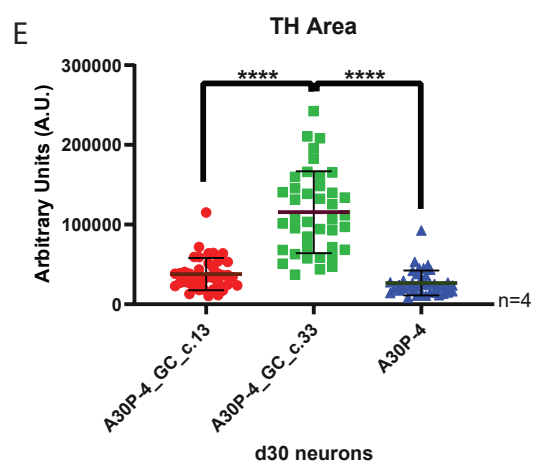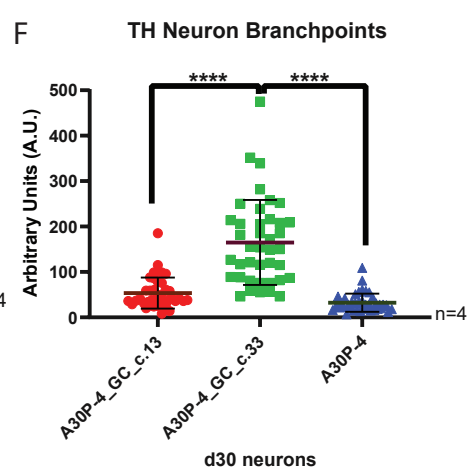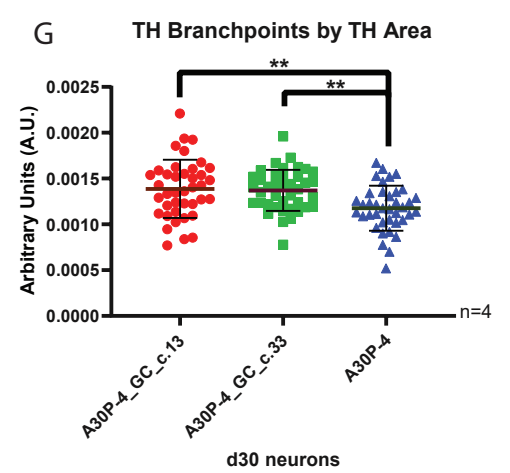

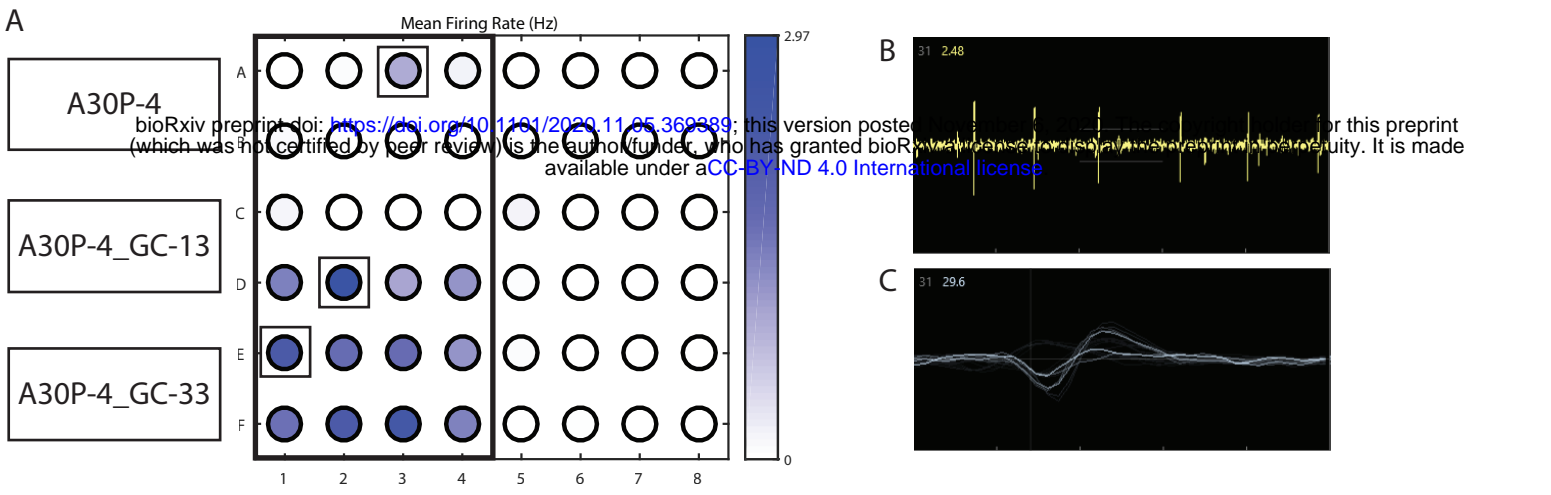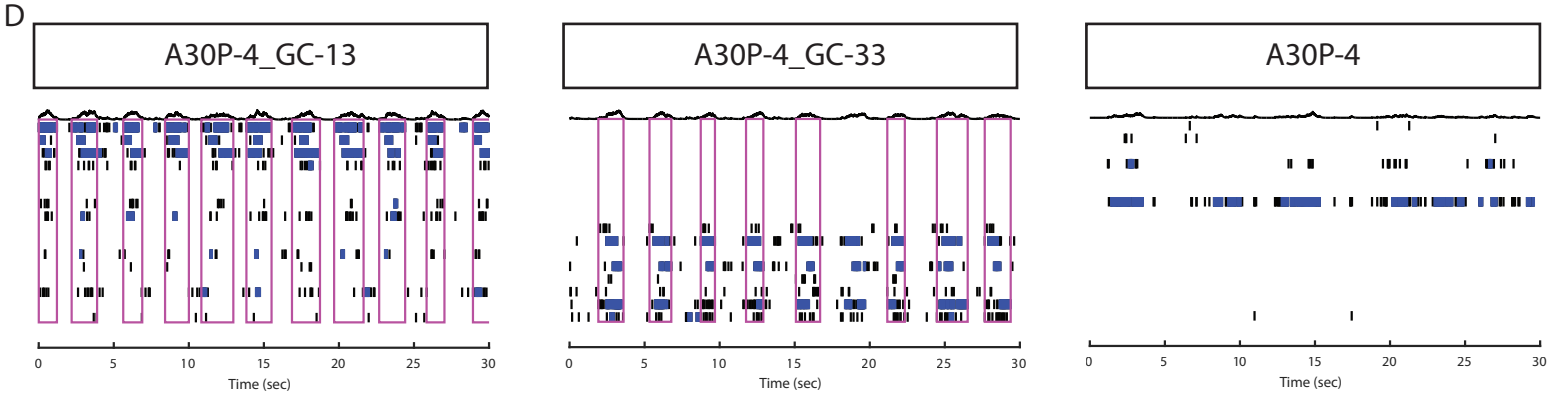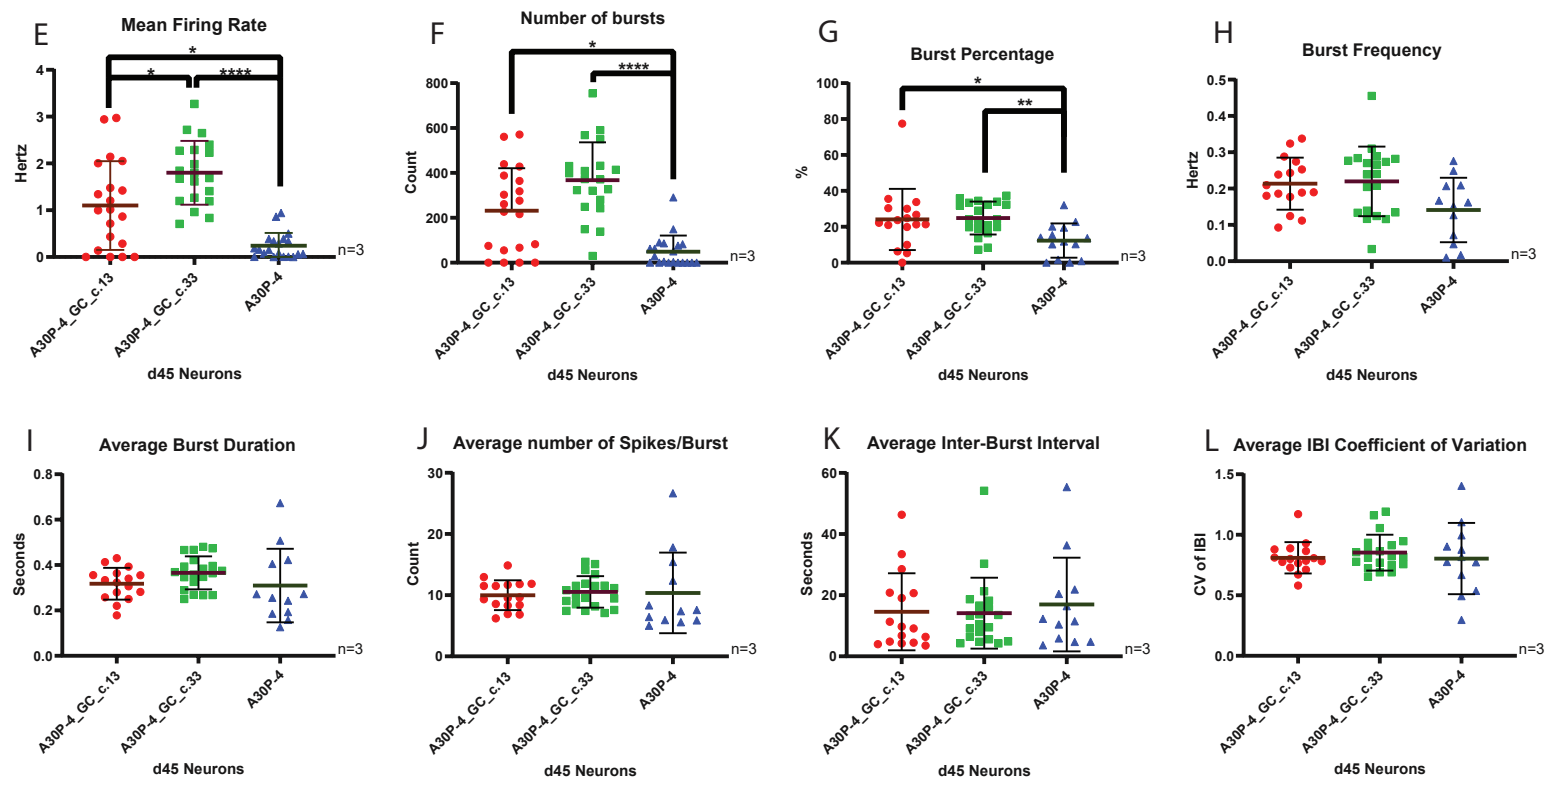

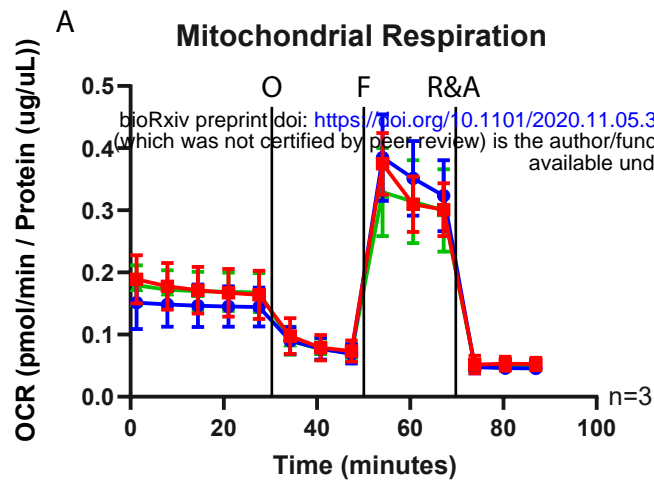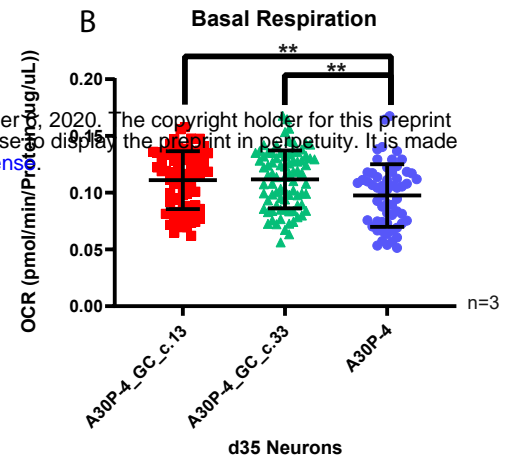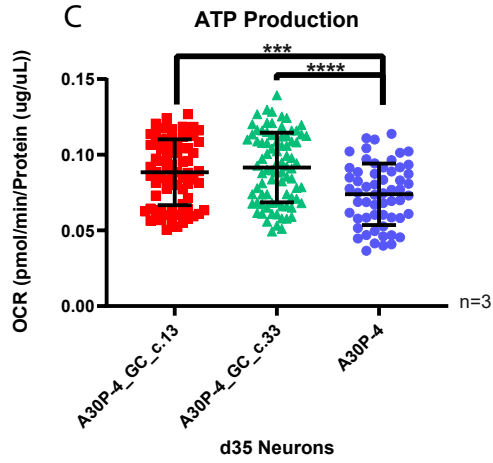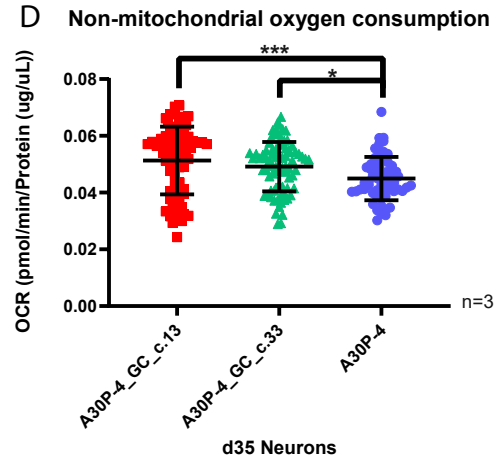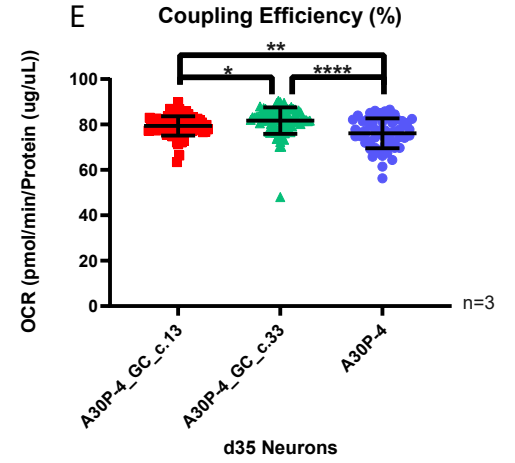

A

## Total Luminescence

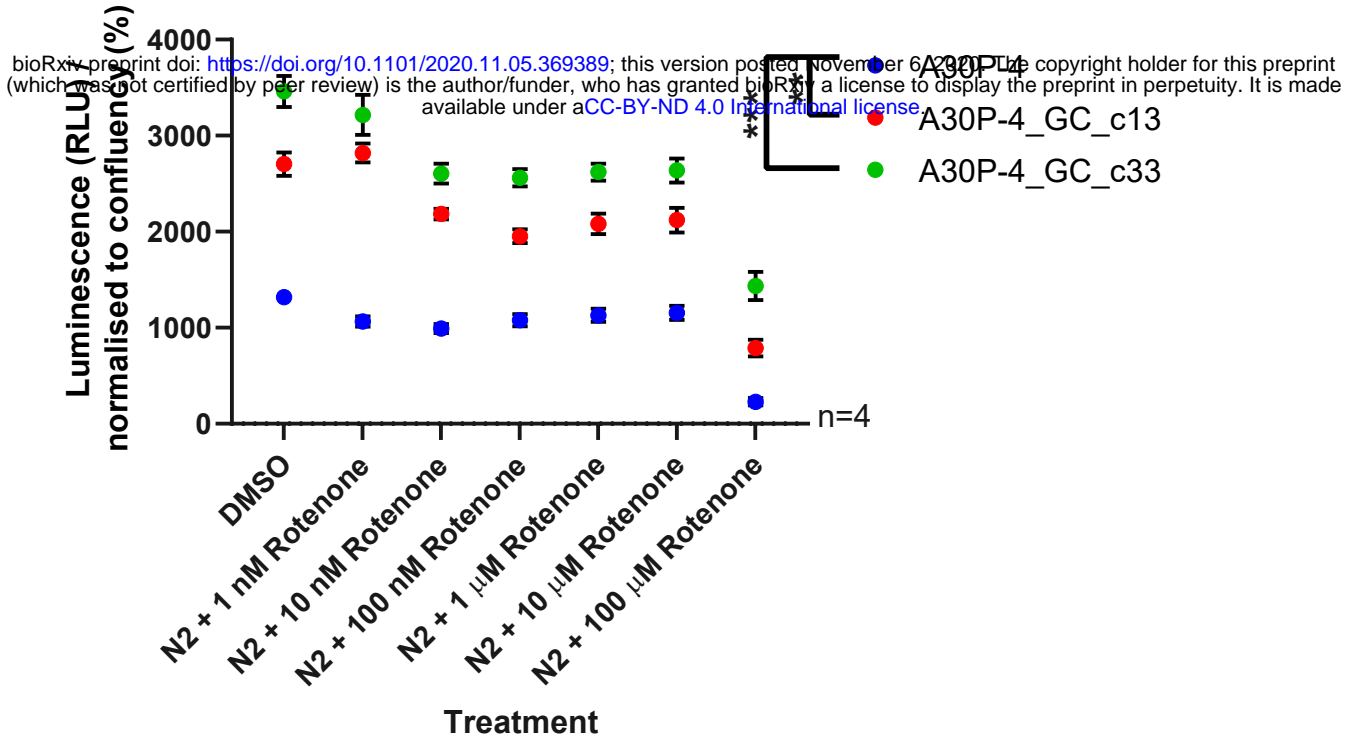

B

## Neuronal Viability

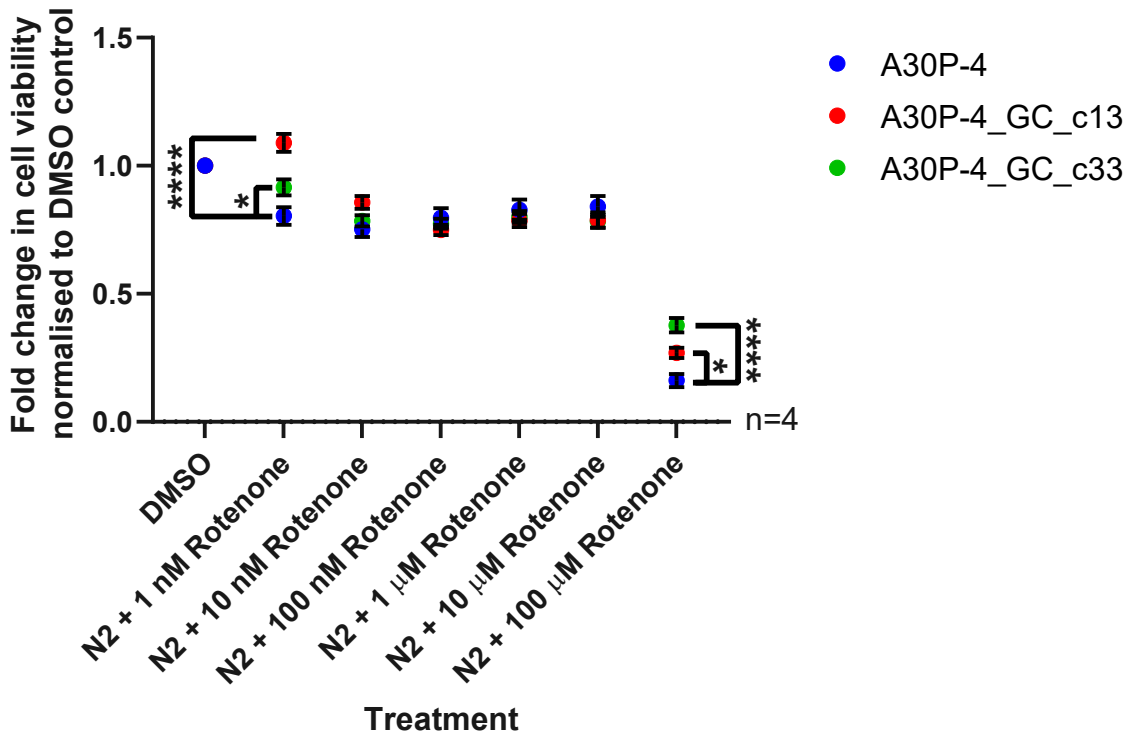

Source: http://biorxiv.org/content/10.1101/2020.11.05.369389v1.full.pdf
